# Supplementary material for: Nutrient Management Influences Root Characteristics and Nitrogen Use Efficiency in the Vegetable-Based Agroecosystem in the Northwestern Himalayas
Source: MDPI journal article supplement (doi:10.3390/su151310593), 2023-07-05
Supplement: s1 [file s1]

Table S1: Methods followed by the analysis of soil physicochemical properties.

| Parameter |                                                    | Methods and Reference                                                                             |
|-----------|----------------------------------------------------|---------------------------------------------------------------------------------------------------|
| 1.        | pH                                                 | 1:2 Soil:water suspension, measured with digital pH meter (Jackson 1973)                          |
| 2.        | EC                                                 | 1:2 Soil:water suspension, measured with digital EC meter (Jackson 1973)                          |
| 3.        | Organic carbon                                     | Walkley and Black wet digestion method (Walkley and Black 1934)                                   |
| 4.        | Available N                                        | Alkaline potassium permanganate method (Subbiah and Asija 1956)                                   |
| 5.        | Available P                                        | Olsen's method (Olsen et al. 1954)                                                                |
| 6.        | Available K, Ca and Mg                             | Ammonium acetate method (Merwin and Peach 1951)                                                   |
| 7.        | Sulphate sulphur                                   | 0.15 % CaCl <sub>2</sub> extractant and turbidimetric determination (Williams and Steinberg 1959) |
| 8.        | Available micro-nutrient cations (Cu, Fe, Mn & Zn) | DTPA extractant method (Lindsay and Norvell 1978)                                                 |

Jackson, M.L. *Soil Chemical Analysis*; Printice Hall of India Pvt. Ltd.: New Delhi, India, 1973; pp. 111–126.

Lindsay, W.H.; Norvell, W.A. Development of DTPA soil test for Zn, Fe, Mn and Cu. *Soil Sci. Soc. Am. J.* **1978**, *42*, 420-428.

Merwin, H.D.; Peech, M. Exchangeability of soils potassium in the sand, silt and clay fractions as influenced by the nature of the complementary exchangeable cations. *Soil Sci. Soc. Afr. Proc.* **1951**, *15*, 125-128.

Olsen, S.R.; Cole, C.V.; Watnabe, F.S. Estimation of available phosphorus by extraction with sodium bicarbonate. *United States Dep. Agric. Circ.* **1954**, *939*, 1-19.

Subbiah, B.W; Asija, G.I. A rapid procedure for estimation of available nitrogen in soils. *Curr. Sci.* **1956**, *25*, 229-260.

Walkley, A.J.; Black, C.A. Estimation of soil organic carbon by the chromic acid titration method. *Soil Sci.* **1934**, *37*, 259-260.

Williams, C.H.; Steinbergs, A. Soil sulphate fractions as chemical indices of available sulphur in some Australian soils. *Aust. J. Agric. Res.* **1959**, *10*, 340-352.
